# Supplementary material
Source: PubMed Central journal article supplement (PMC4537806)

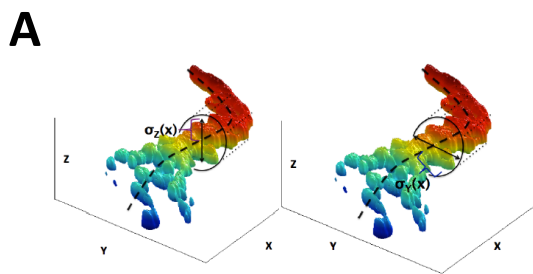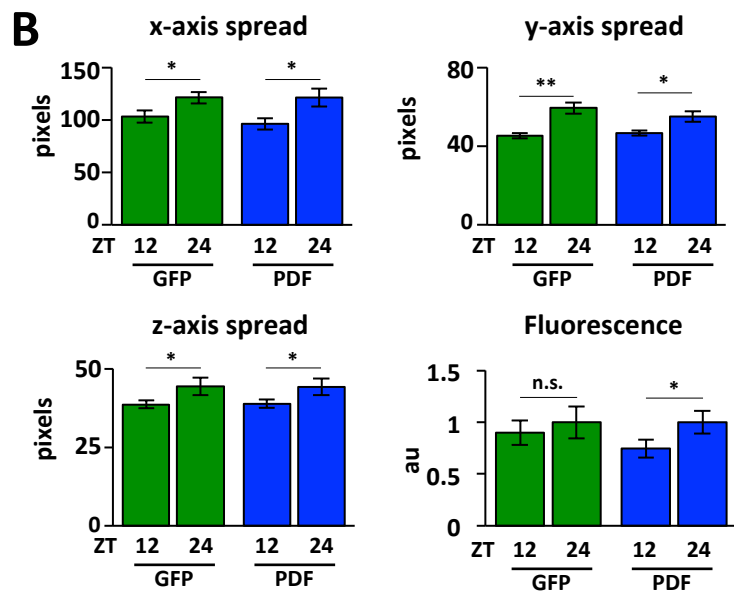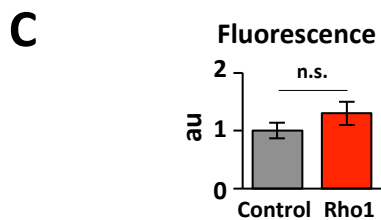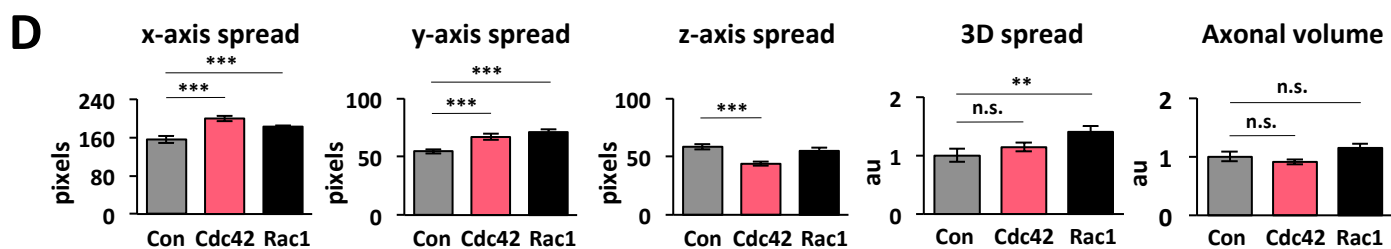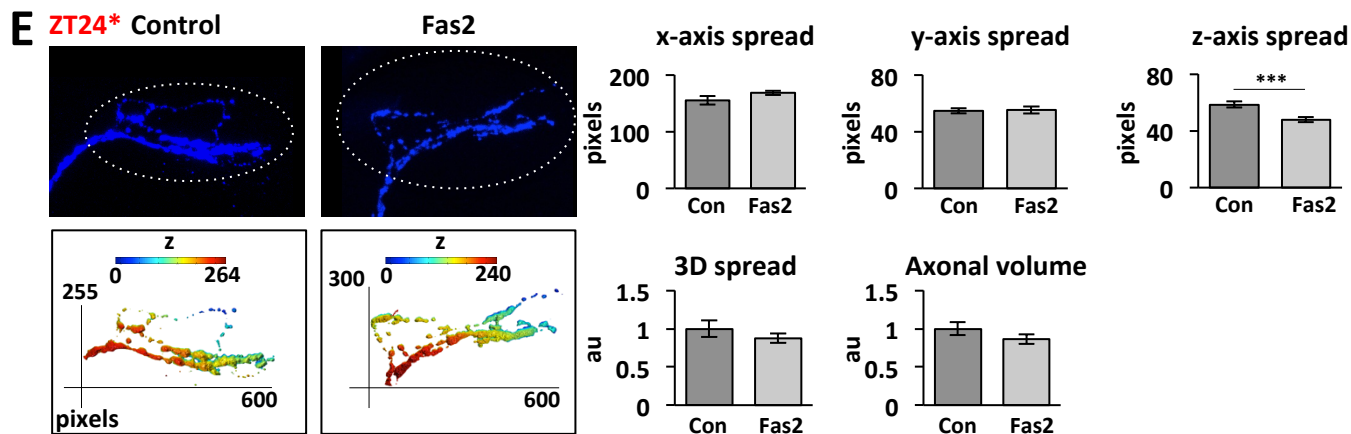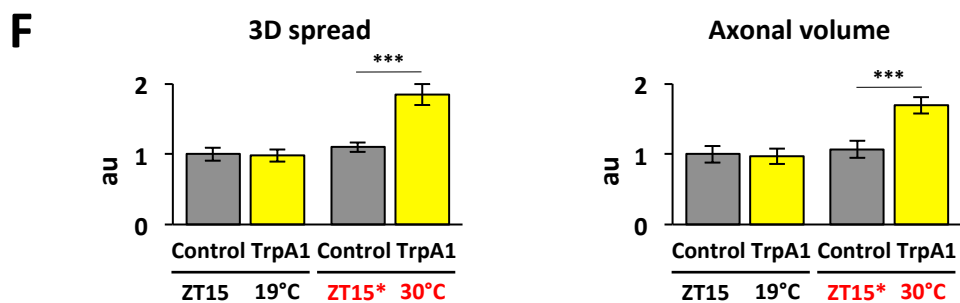

Supplement: NIHMS707496-supplement-1.pdf [file NIHMS707496-supplement-1.pdf]

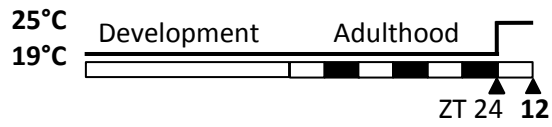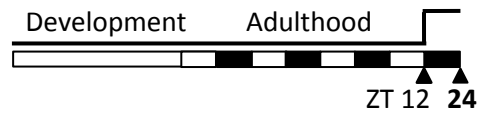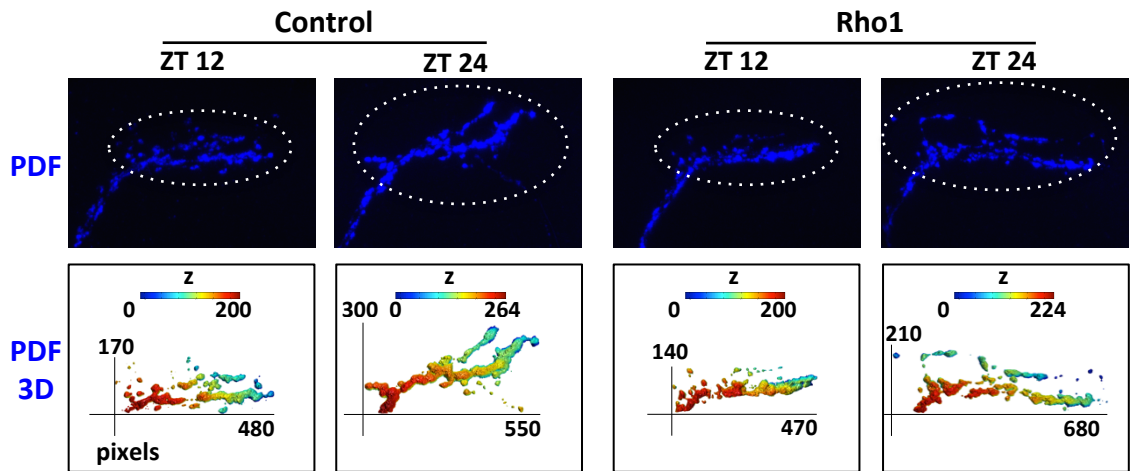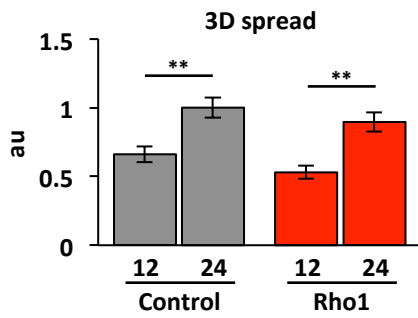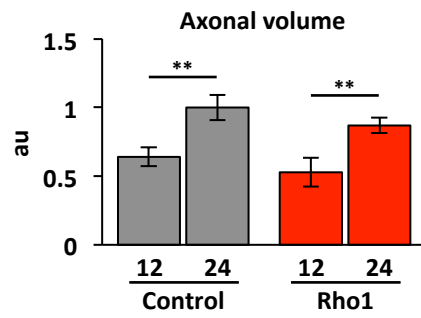

Supplement: NIHMS707496-supplement-2.pdf [file NIHMS707496-supplement-2.pdf]

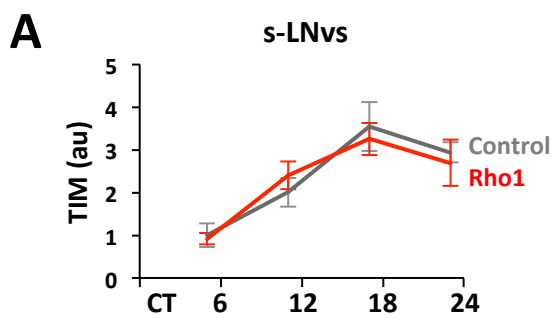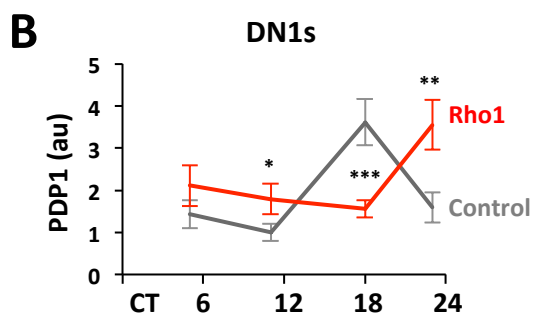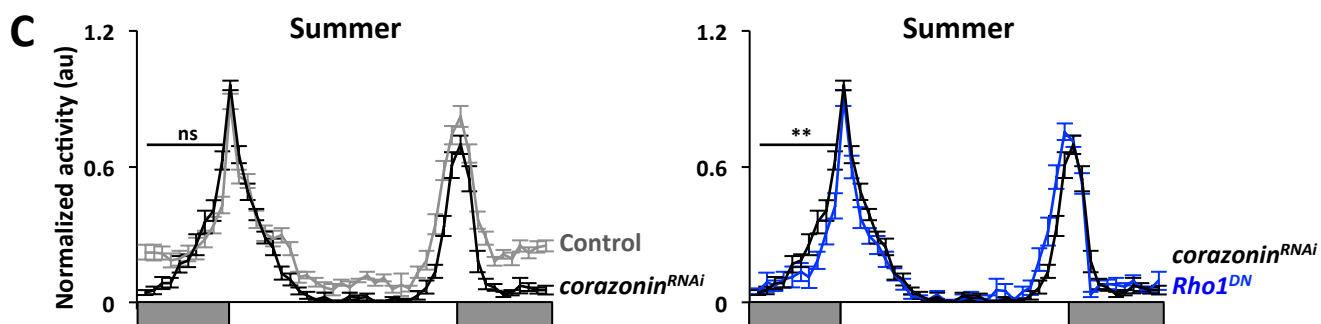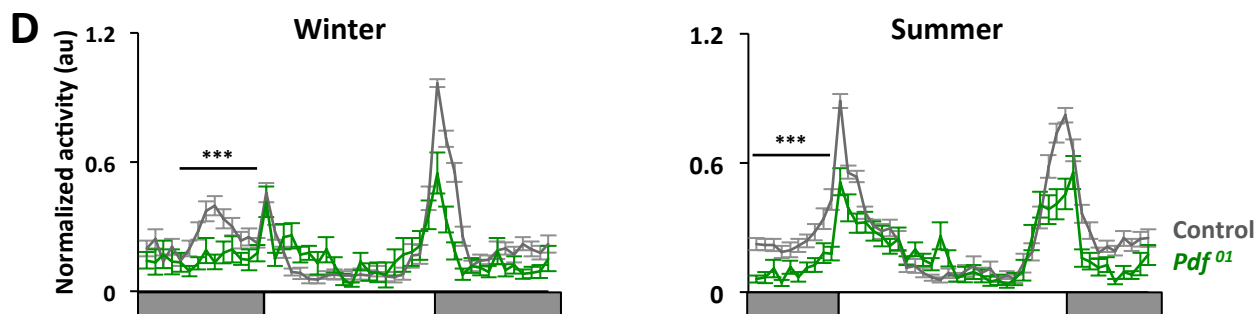

Supplement: NIHMS707496-supplement-3.pdf [file NIHMS707496-supplement-3.pdf]

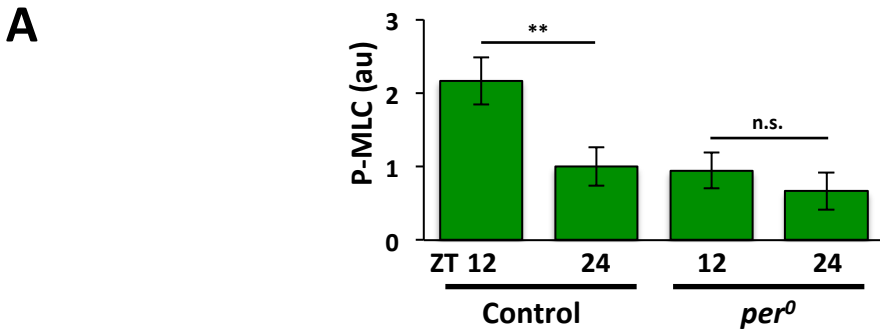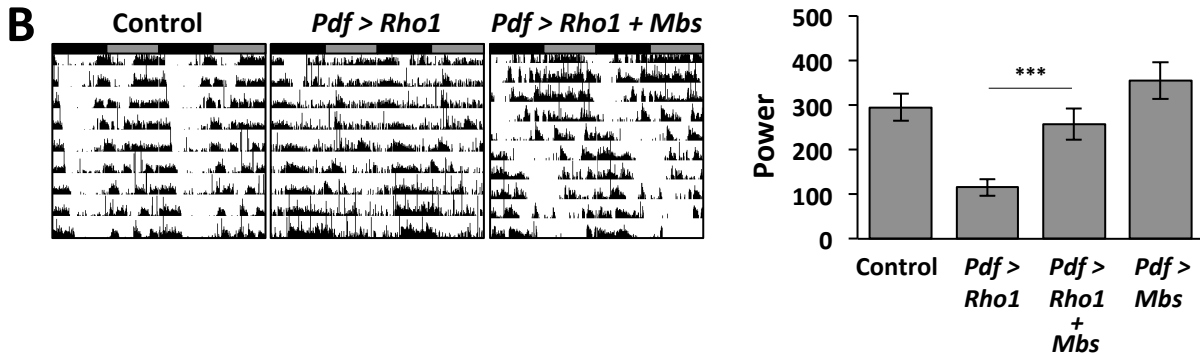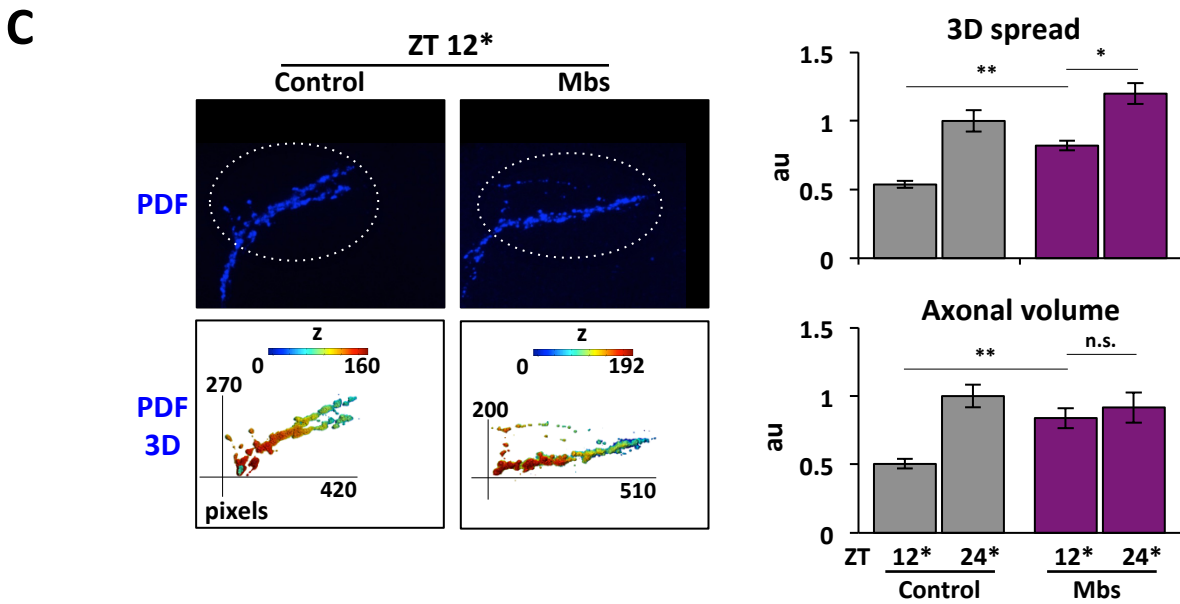

Supplement: NIHMS707496-supplement-4.pdf [file NIHMS707496-supplement-4.pdf]

**A**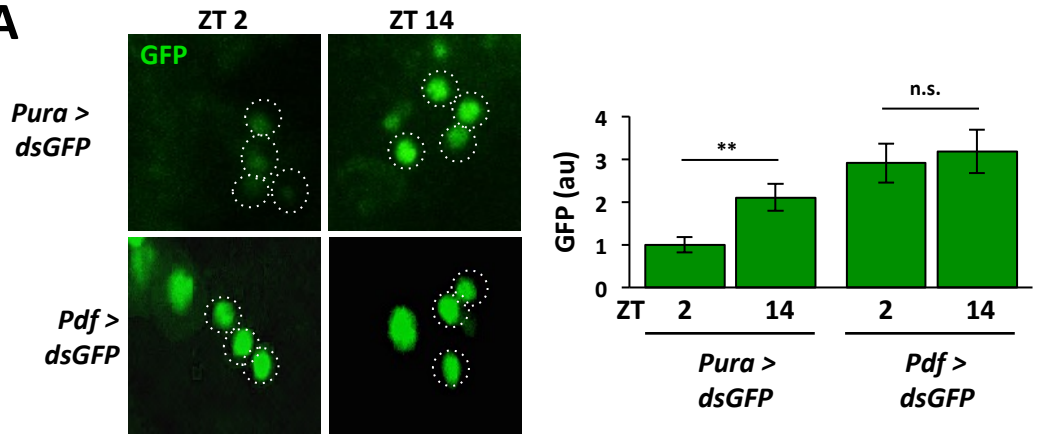**B**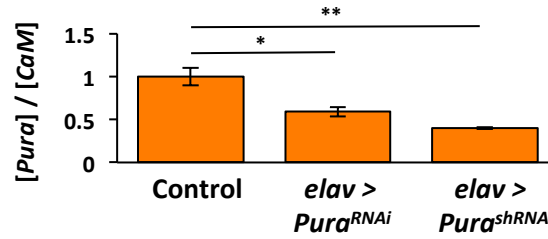**C**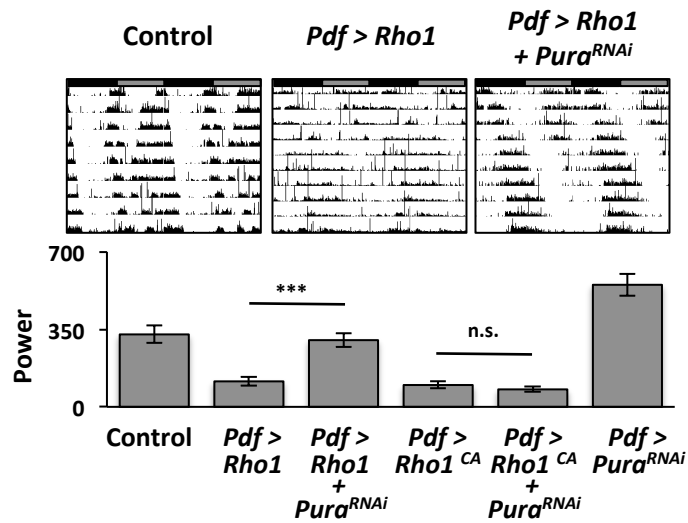**D**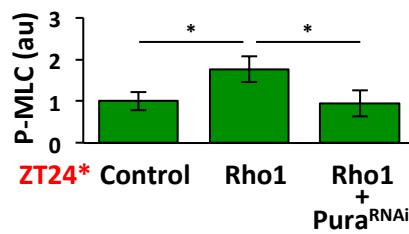**E**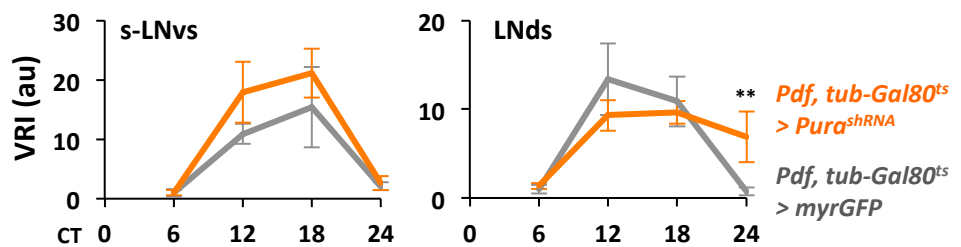

Supplement: NIHMS707496-supplement-5.pdf [file NIHMS707496-supplement-5.pdf]

ZT2\*

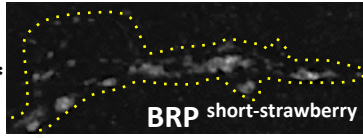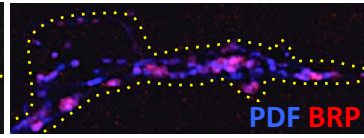

Supplement: NIHMS707496-supplement-6.pdf [file NIHMS707496-supplement-6.pdf]
